# Novel Regulatory Small RNAs in *Streptococcus pyogenes*

Rafael A. Tesorero<sup>1</sup>, Ning Yu<sup>2</sup>, Jordan O. Wright<sup>1</sup>, Juan P. Svencionis<sup>1</sup>, Qiang Cheng<sup>2</sup>, Jeong-Ho Kim<sup>3</sup>, Kyu Hong Cho<sup>1\*</sup>

**1** Department of Microbiology, Southern Illinois University, Carbondale, Illinois, United States of America, **2** Department of Computer Science, Southern Illinois University, Carbondale, Illinois, United States of America, **3** Department of Biochemistry and Molecular Biology, The George Washington University Medical Center, Washington, District of Columbia, United States of America

## Abstract

*Streptococcus pyogenes* (Group A *Streptococcus* or GAS) is a Gram-positive bacterial pathogen that has shown complex modes of regulation of its virulence factors to cause diverse diseases. Bacterial small RNAs are regarded as novel widespread regulators of gene expression in response to environmental signals. Recent studies have revealed that several small RNAs (sRNAs) have an important role in *S. pyogenes* physiology and pathogenesis by regulating gene expression at the translational level. To search for new sRNAs in *S. pyogenes*, we performed a genome-wide analysis through computational prediction followed by experimental verification. To overcome the limitation of low accuracy in computational prediction, we employed a combination of three different computational algorithms (sRNAPredict, eQRNA and RNAz). A total of 45 candidates were chosen based on the computational analysis, and their transcription was analyzed by reverse-transcriptase PCR and Northern blot. Through this process, we discovered 7 putative novel *trans*-acting sRNAs. Their abundance varied between different growth phases, suggesting that their expression is influenced by environmental or internal signals. Further, to screen target mRNAs of an sRNA, we employed differential RNA sequencing analysis. This study provides a significant resource for future study of small RNAs and their roles in physiology and pathogenesis of *S. pyogenes*.

**Citation:** Tesorero RA, Yu N, Wright JO, Svencionis JP, Cheng Q, et al. (2013) Novel Regulatory Small RNAs in *Streptococcus pyogenes*. PLoS ONE 8(6): e64021. doi:10.1371/journal.pone.0064021

**Editor:** Bernard Beall, Centers for Disease Control & Prevention, United States of America

**Received:** February 17, 2013; **Accepted:** April 8, 2013; **Published:** June 6, 2013

**Copyright:** © 2013 Tesorero et al. This is an open-access article distributed under the terms of the Creative Commons Attribution License, which permits unrestricted use, distribution, and reproduction in any medium, provided the original author and source are credited.

**Funding:** This work was supported by Scientist Development Grant 11SDG7440083 from the American Heart Association to KHC and NIH grant GM087470 to JHK. The funders had no role in study design, data collection and analysis, decision to publish, or preparation of the manuscript.

**Competing Interests:** The authors have declared that no competing interests exist.

\* E-mail: kyuhongcho@gmail.com

## Introduction

Small non-coding RNAs exist in all life forms and are now regarded as novel widespread regulators of gene expression. In bacteria, these RNAs are collectively referred to as ‘small RNAs’ or ‘sRNAs’. Bacterial small regulatory RNAs recently have received tremendous attention because of their abundance and important role in a variety of cellular processes including response to environmental stress and involvement in pathogenicity (for recent reviews, refer to [1,2,3,4,5,6]). While bacterial sRNAs show dramatic heterogeneity in size (30–500 nucleotides in length) and structure, their functional roles are similar to each other; they regulate gene expression mostly at the translational level in response to environmental signals [4,7]. Since regulation at the translational level results in a quicker effect than that at the transcriptional level, bacteria use sRNAs for immediate response to environmental change, growth phase, and immune reaction. Most sRNAs participate in post-transcriptional regulation by base-pairing with target mRNAs, which results in the regulation (both inhibition or activation) of translation or degradation of the mRNAs [8]. A small fraction of sRNAs interact with RNA-binding proteins to modify their activities [9]. The sRNAs that bind to target mRNAs often have 5′ and 3′ stem-loop structures flanking central unpaired regions, while the sRNAs that bind to proteins other than RNA chaperones often fold into highly paired, extended hairpin structures [9].

*S. pyogenes* is a Gram-positive pathogen, which causes diseases ranging from mild superficial infections such as pharyngitis and impetigo to life-threatening systemic diseases including toxic shock and necrotizing fasciitis. These diseases still remain a major public health concern both in developed and developing countries. More than 30 million cases of streptococcal pharyngitis occur each year in the USA. Worldwide, *S. pyogenes* causes over 18 million cases of severe diseases resulting in over a half million annual deaths [10]. *S. pyogenes* infects many different tissues including the skin, throat, muscle and blood [11]. To cause these infections, *S. pyogenes* not only produces various virulence factors, but also regulates the expression of their genes in an exquisite manner. In *S. pyogenes*, research on the regulation of gene expression has focused mainly on protein regulators such as two-component and stand-alone regulators. Recent studies, however, have revealed that sRNAs also play a crucial role in *S. pyogenes* pathogenesis [12,13,14,15,16].

Compared to the number of *E. coli* sRNAs discovered so far (more than 80 [17]), the number of experimentally verified *S. pyogenes* sRNAs is relatively small. Only 17 sRNAs have been validated with mostly Northern blotting [12,13,14,16,18,19,20] or mutational analysis [15]. This implies that systematic genome-wide search for sRNAs in *S. pyogenes* may not have been sufficiently carried out. In this study, through employing a combination of three computational algorithms and Northern blotting, we discovered 7 novel sRNAs in *S. pyogenes*.

A)

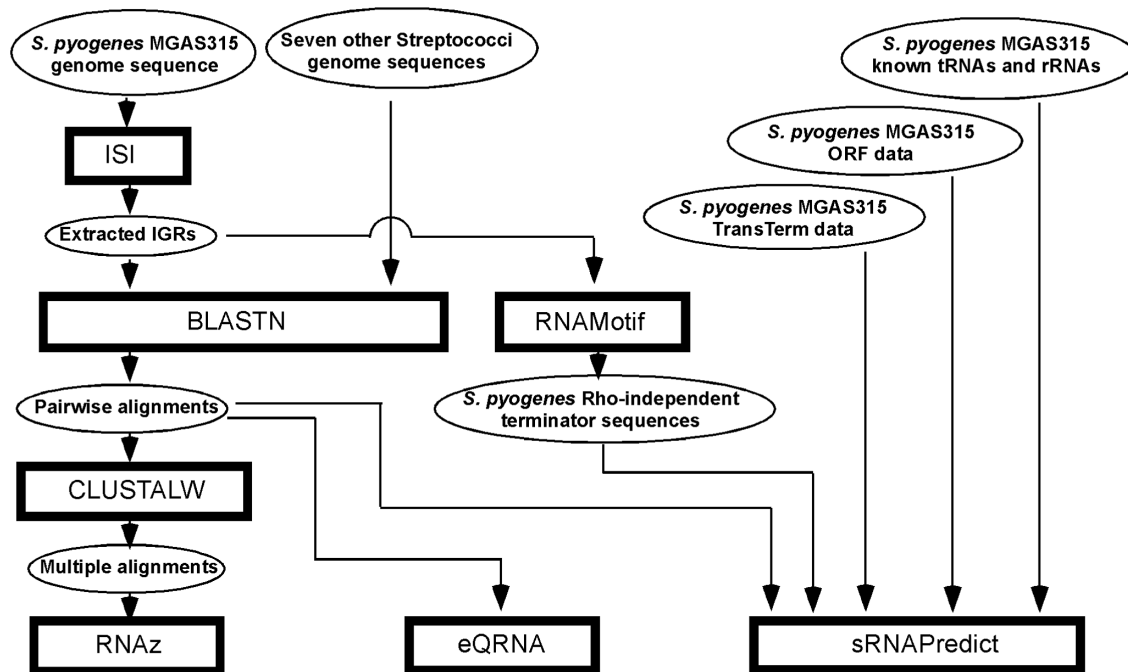

B)

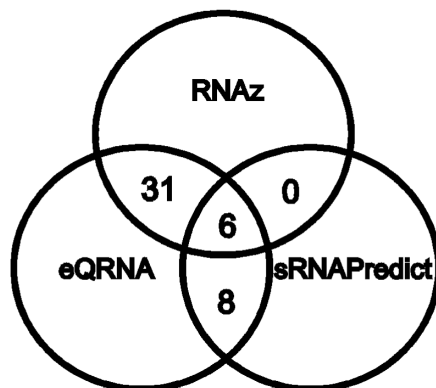

**Figure 1. A combination of three computational algorithms was used to predict small regulatory RNAs in *S. pyogenes*.** A) The scheme of the computational approach for the prediction of small RNAs in *S. pyogenes*. The rectangles, ovals, and arrow lines represent computational algorithms, input or output data of computational analyses, and data flow, respectively. The processes were performed to run the algorithms, RNAz, eQRNA and sRNAPredict. B) The candidates predicted by any two algorithms at the same time were considered sRNA candidates. Then, putative *cis*-regulatory sequences located immediately upstream of annotated ORFs and candidates within prophage sequences were removed from the candidate list. The number of final candidates selected in this manner was 45. doi:10.1371/journal.pone.0064021.g001

## Methods

### Bacterial strains and media

*S. pyogenes* MGAS315 [21] was used for most experiments. MGAS315 is a non-mucoid clinical strain isolated from a patient with streptococcal toxic shock syndrome, and its genome sequence is publically available [21]. *S. pyogenes* was routinely cultured in Todd-Hewitt medium (BBL) supplemented with 0.2% yeast extract (Difco) at 37°C in sealed tubes without agitation.

### Computational analysis for the screening of putative *S. pyogenes* small RNAs

In this study, we employed three computational algorithms to increase prediction accuracy: eQRNA, RNAz, and sRNAPredict. The computational approaches are illustrated in Figure 1 and the sources and references of the computational algorithms used in this study are listed in Table 1. The genomic information of the following eight streptococci necessary to run these algorithms, such as genome sequences, loci and names of open reading frames (ORFs), tRNAs, tmRNA, rRNAs and IGRs, was downloaded

**Table 1.** The list of computational algorithms used in this study.

| Computational Method used | Source                                                                                                        | Ref     |
|---------------------------|---------------------------------------------------------------------------------------------------------------|---------|
| ISI                       | <a href="http://www.biochpharma.univ-rennes1.fr/">http://www.biochpharma.univ-rennes1.fr/</a>                 | [61]    |
| WU-BLAST (BLAST 2.0)      | <a href="http://blast.wustl.edu">http://blast.wustl.edu</a>                                                   | [62]    |
| RNAz 1.0                  | <a href="http://www.tbi.univie.ac.at/~wash/RNAz">http://www.tbi.univie.ac.at/~wash/RNAz</a>                   | [35]    |
| ClustalW 2.0.11           | <a href="http://www.ebi.ac.uk/Tools/clustalw2/index.html">http://www.ebi.ac.uk/Tools/clustalw2/index.html</a> | [63]    |
| eQRNA 2.0.3c              | <a href="ftp://selab.janelia.org/pub/software/qrna/">ftp://selab.janelia.org/pub/software/qrna/</a>           | [34]    |
| RNAmotif 3.0.5            | <a href="http://casegroup.rutgers.edu/">http://casegroup.rutgers.edu/</a>                                     | [64]    |
| sRNAPredict 3             | <a href="http://newbio.cs.wisc.edu/sRNA/">http://newbio.cs.wisc.edu/sRNA/</a>                                 | [29,30] |
| TransTerm 2.07            | <a href="http://transterm.cbcb.umd.edu">http://transterm.cbcb.umd.edu</a>                                     | [65]    |

doi:10.1371/journal.pone.0064021.t001

from the NCBI website (<ftp://ftp.ncbi.nih.gov/genomes/Bacteria/>): *S. pyogenes* MGAS315, *S. equi* subsp. *zooepidemicus* MGCS10565, *S. mutans* UA159, *S. suis* 05ZYH33, *S. sanguinis* SK36, *S. gordonii* str. *Challis* substr. CH1, *S. pneumoniae* CGSP14, *S. agalactiae* NEM316.

To run sRNAPredict, the coordinates and the orientations of 1865 ORFs, 67 tRNAs, 18 rRNAs and 1tmRNA in the genome of *S. pyogenes* MGAS315 were marked and then 1587 IGRs were extracted by Intergenic Sequence Inspector (ISI). To predict the location of Rho-independent terminators of *S. pyogenes* MGAS315, the RNAMotif program and the TransTerm database were used. RNAMotif searches RNA sequences that match a “motif” describing the interactions of secondary structures, which are defined via a pattern language whose symbols represent helices and single stranded stretches. Matches can be ranked by applying scoring rules that may provide finer distinctions than just matching to a profile. Rho-independent terminators predicted by TransTerm were obtained from the TransTerm website at University of Maryland. Putative terminators whose probabilities (confidence) were greater than 90% were chosen for sRNAPredict analysis. Parameters applied to sRNAPredict analysis are as follows; the minimum distance of predicted terminator from the end of an upstream ORF: 30 nts, the maximum length of gap between a putative terminator and a region of sequence conservation: 20 nts, the values for the minimum and maximum length of putative sRNAs: 30 nts and 550 nts.

For the prediction with eQRNA and RNAz, a file containing intergenic regions (IGRs) of *S. pyogenes* MGAS315 was generated using ISI. The number of the extracted IGRs from *S. pyogenes* MGAS315 genome by ISI was 3166 sequences from both DNA strands, totaling about 0.681 MB which represents 17.9% of the full genome. The average sequence length was 138 nts, with the longest one being 1501 nts and the shortest one being 1 nt. Then, the WU-BLAST 2.0 program was used for genome wide sequence homology analysis between IGRs of *S. pyogenes* MGAS315 and the genomes of the other seven streptococci. The IGRs with a length >12 nts were used as queries. The output data of the BLAST analysis gave pairwise alignments between the query sequences, that are the IGRs of *S. pyogenes* MGAS315, and the subject sequences, that are the genomic segments of the other seven streptococci. These pairwise alignments of 2118 comparisons were filtered with the parameters of *E*-values <0.00001 and length >30 nts (Table S1). These pairwise alignments were scanned by CLUSTALW to produce multiple alignments. From the multiple alignments, the long sequences with the length >550 nts were removed. Alignments contained sequences from both DNA strands, and candidates were selected when a signal was identified

from either of the two strands. RNAz and eQRNA predictions from the alignments were incorporated into a single predicted RNA locus on the genome. An additional set of alignments was obtained using 69 known RNAs (68 tRNAs and one tmRNA) as queries. These RNA alignments were generated using the same BLAST parameters, and were used to evaluate the sensitivity and specificity of those computational analyses. The multiple sequence alignments that were formatted to CLUSTALW data were used as the input source for RNAz. The CLUSTALW program uses FASTA format as input data. Thus, we transformed the pairwise sequences from BLASTN to FASTA format to execute CLUSTALW. Both RNAz and eQRNA used the window size of 150 nts and the window slide increment of 50 nts. To test sensitivity and specificity of this approach, we used 68 known tRNAs and tmRNA as controls. Through the RNAz and eQRNA analyses, 65 out of 68 *S. pyogenes* tRNAs and tmRNA were identified (95.6% sensitivity) (Table S2). To test the specificity of the RNAz and eQRNA analyses, we shuffled the sequences of the tRNAs and tmRNA and estimated the false positives if any shuffled sequence was considered as sRNA. For shuffling of sequences, the RNAs were divided into several groups and the sequence locations of the groups (each group has 20 nts and the size of an ordinary tRNA is about 70 nts) were exchanged. This shuffling keeps the sequence conservation but not the conservation of secondary structures. The number of false positives obtained from this process was 1/68 (1.47%), so the specificity was 98.5% (Table S2). RNAz analysis shows similar sensitivity but higher specificity than the eQRNA analysis, and the combination of RNAz and eQRNA analyses increased specificity compared to the individual analysis, as expected (Table S2).

The computer algorithms used in this study and the result of each process can be downloaded from [www.cs.siu.edu/nyu/research.htm](http://www.cs.siu.edu/nyu/research.htm).

### RNA extraction from *S. pyogenes* MGAS315

Total *S. pyogenes* RNA was extracted using the combination of the miRNeasy kit (Qiagen) and the FastPrep beadbeater (MP biomedical). An *S. pyogenes* cell pellet from 10 ml culture was resuspended in 700  $\mu$ l of the Qiazol lysis reagent provided in the miRNeasy kit and transferred to a Lyse Matrix B blue cap tube (MP biomedical). Cells were then lysed by the beadbeater, FastPrep 24 (MP biomedical) at the speed of 6.0 for 40 seconds twice. The remaining procedure for RNA extraction followed the manufacturer’s protocol of the miRNeasy kit. The A260/A280 ratio of the extracted RNA was measured with NanoDrop (Thermo Scientific) to determine the RNA concentration and purity (accepted if >1.8). The extracted RNA was mixed with 1  $\mu$ l

of RNasin (Promega Recombinant RNasin Ribonuclease Inhibitor, 40 u/μl), and treated with RNase-Free DNase (Promega DNase I, 1u/μl) according to the manufacturer's protocol.

### Northern blot analysis

*S. pyogenes* MGAS315 was grown in THY medium at 37°C and harvested with centrifugation (at 6,000 × g for 3 min) at the exponential phase (OD<sub>600</sub>, Optical density at 600 nm, = ~0.5), the early stationary phase (OD<sub>600</sub> = ~1.2) or the late stationary phase (cells were grown for 3 hrs more from the early stationary phase, OD<sub>600</sub> = ~1.5). Then, Total RNA was extracted as described above. The extracted RNA (20 μg) was mixed with loading dye containing 50% (v/v) formaldehyde, loaded onto denaturing polyacrylamide gel (6% polyacrylamide (acrylamide: bis-acrylamide = 29:1) with 7% urea) pre-run at 400 V for an hour, and electrophoresed at 300 V. For an RNA size marker, 5 ng of Low Range SSRCNA Ladder (New England BioLab, 500 μg/ml) was loaded in a well. The separated RNA was transferred onto a nylon membrane (Zeta Probe Blotting Membrane, Bio-Rad) with a semi-dry electroblotter (Bio-Rad Trans-Blot SD Transfer Cell) at 400 mA for two hours at 4°C. The RNA on the nylon membrane was cross-linked to the membrane with 1-ethyl-3-(3-dimethylaminopropyl)-carbodiimide (EDC) [22]. The membrane was then prehybridized with 5X SSPE/2% SDS hybridization buffer for 30 min and hybridized for 18 hrs with the same buffer containing a 40 nM single stranded DNA oligonucleotide probe (Table S3). The probe had been <sup>32</sup>P-labeled at 5'-end with γ-<sup>32</sup>P ATP (10 mCi/ml, PerkinElmer) by T4 polynucleotide kinase (Epicentre Technologies). The probes were designed to bind at the center of putative small RNAs predicted by the computational algorithms. Because the list of sRNA candidates from the computational analysis did not provide information on which DNA strand encodes each sRNA candidate, we designed and tested two probes annealing to each strand. The sequence of each probe is shown in Table S3. After hybridization, the membrane was washed with wash solutions and exposed to X-ray film (autoradiography).

### Reverse transcriptase PCR (RT-PCR)

*S. pyogenes* MGAS315 was grown in THY medium at 37°C until it reached an OD<sub>600</sub> of 0.5. The cells were harvested with centrifugation and total RNA was extracted as described in "RNA Extraction from *S. pyogenes* MGAS315". The extracted RNA was converted to cDNA using reverse transcriptase (ImProm II Reverse Transcriptase, Promega) according to the manufacturer's protocol. Briefly, RNA (2 μg) was mixed with 500 ng of random primers (Promega) and adjusted to 5 μl with RNase free water. The RNA mixture was incubated at 65°C for five minutes and then chilled at 4°C for five minutes. A mix containing 2.4 μl of MgCl<sub>2</sub> (25 nM), 4 μl of ImProm-II 5× reaction buffer, 1 μl of ImProm-II Reverse Transcriptase, 1 μl of dNTPs (10 nM) and 6.6 μl of RNase Free water was added to the RNA mix and incubated at 25°C for five minutes, followed by 42°C for one hour, and then heat inactivated at 70°C for fifteen minutes. Regular PCR was performed with the cDNA as a template. RNA (without reverse transcriptase reaction) was used as a control to confirm that a PCR product was not from chromosomal DNA contamination (RNA was rejected before producing cDNA if PCR amplification performed with the RNA template indicated the presence of contaminating DNA). PCR products and a DNA ladder (1 Kb Plus DNA Ladders, Invitrogen) were electrophoresed on a 2% agarose gel.

Primers for RT-PCR were designed with the parameters of 1 bp GC clamp at 3' end, 20 nts size, 100–200 nts product size, and 60°C melting temperature (Table S4).

### Circular RACE to determine sRNA transcriptional start and stop sites

The transcriptional start and stop sites of sRNA candidates were determined using circular RACE (Rapid Amplification of cDNA ends) as described elsewhere [23]. Briefly, RNA was extracted from *S. pyogenes* cultures in the exponential phase (OD<sub>600</sub> of 0.5) as described above. The RNA was treated with Tobacco Acid Pyrophosphatase (TAP) (Epicentre) to remove pyrophosphate from the 5' end. The 5' end was then ligated to the 3' end with T4 RNA ligase (Epicentre) to make circular transcripts. The circular transcripts were reverse transcribed using gene specific primers to make first strand cDNA. The first strand cDNAs were amplified with PCR. The PCR products were cloned into pGEM-T (Promega) and sequenced to determine transcriptional start and stop sites. Primers for the circular RACE used in this study are listed in Table S5.

### Deletion of SSRC21 in the chromosome

To create a deletion mutant of SSRC21, ΔSSRC21cat, 144 bps of the internal part of SSRC21 was deleted and replaced with a chloramphenicol acetyltransferase gene (*cat*) [24] through a double cross over homologous recombination. To achieve this, first, two DNA fragments flanking SSRC21 on each side were amplified with primers and joined to delete SSRC21. The primers 5outSSRC21far and 3inSSRC21 were used to amplify 1.23 kbps DNA fragment upstream of SSRC21, and 5inSSRC21 and 3outSSRC21PstI were used to amplify 0.69 kbps DNA fragment downstream of SSRC21 (Table 2). These two fragments were digested with *Xma*I, ligated, and PCR amplified with the primers 5outSSRC21 and 3outSSRC21PstI (Table 2). The PCR-amplified 1.36 kbps DNA was sequenced to confirm the deletion of SSRC21 and inserted into vector pJRS233 [25]. The deleted SSRC21 was replaced with the *cat* gene (0.98 kbps) that was PCR-amplified from pABG5 [26] with the primers of 5cat*Xma*I and 3cat*Xma*I (Table 2). The *cat* gene flanked with ~0.7 kbp streptococcal DNAs on each side was amplified with the same primers used to amplify the 1.36 kbp PCR fragment (5outSSRC21 and 3outSSRC21PstI), and then used to transform MGAS315 (wild type) by electroporation. The mutant showing chloramphenicol resistance was selected and the chromosomal structure was confirmed by PCR.

**Table 2.** Primers to be used to create the SSRC21 deletion mutant, ΔSSRC21cat.

| Name              | Sequence <sup>#</sup>                         |
|-------------------|-----------------------------------------------|
| 5outSSRC21far     | GGTATTAAGGATAGCACATCAAC                       |
| 3inSSRC21         | TTT <b>CCCGG</b> GCAATCGACTCATCGCATAACG       |
| 5inSSRC21         | TTT <b>CCCGG</b> GATCTTAGTAAAATTCAGAATGTATCAG |
| 3outSSRC21PstI    | TTT <b>CTGCAG</b> GGAGGGGAGTTCCAAAATG         |
| 5outSSRC21        | TTT <b>GGATCC</b> ATGTGGTCTATCACAGAAAAGAAC    |
| 3outSSRC21PstI    | TTT <b>CTGCAG</b> GGAGGGGAGTTCCAAAATG         |
| 5cat <i>Xma</i> I | AA <b>ACCCGGG</b> GATTTCCTGCTACGCTCAAATC      |
| 3cat <i>Xma</i> I | AA <b>ACCCGGG</b> CTTCTCAACTAACGGGGCAG        |

<sup>#</sup>The restriction enzyme sites in primers are indicated in bold.  
doi:10.1371/journal.pone.0064021.t002

## Next-generation sequencing, RNA-Seq

Total RNA was extracted from *S. pyogenes* cultures in the exponential phase (OD<sub>600</sub> of 0.5) as described above, and submitted to Otogenetics Corporation (Norcross, GA USA) for RNA-Seq assays. Briefly, the integrity and purity of total RNA were assessed using Agilent Bioanalyzer and OD260/280. Up to 5 µg of total RNA was subjected to rRNA depletion using the RiboZero Meta-Bacteria kit (Epicentre Biotechnologies, Madison, WI USA, catalog # MRZMB126) and cDNA was generated from the depleted RNA using the NEBNext mRNA Sample Prep kit (New England Biolabs, Ipswich, MA USA, catalog# E6110). cDNA was profiled using Agilent Bioanalyzer, and subjected to Illumina library preparation using NEBNext reagents (New England Biolabs, Ipswich, MA USA, catalog# E6040). The quality and quantity and the size distribution of the Illumina libraries were determined using an Agilent Bioanalyzer 2100. The libraries were then submitted for Illumina HiSeq2000 sequencing according to the standard operation. Paired-end 90 or 100 nucleotide (nt) reads were generated and subjected to data analysis using the platform provided by Center for Biotechnology and Computational Biology (University of Maryland, College Park, MD USA) as previously described [27]. The data sets generated from RNA-Seq were mapped against GenBank AE014074 (<http://www.ncbi.nlm.nih.gov/nucore/21905618>) with Bowtie2 (V2.0.0.5). Hits on regions defined by GenBank were then counted with bedtools. To determine the difference of gene expression between samples, EdgeR (Empirical analysis of digital gene expression data in R) was used. We deposited our RNA seq dataset to NIH Short Read Archive with the accession number SRP020234.

## Results

### Computational analysis to predict small RNAs in *S. pyogenes* MGAS315

Along with experimental strategies based on shotgun cloning or microarray methods, computational predictions and validation with Northern blot have been a popular method used to identify many sRNAs (for a review, refer to [28]). Most computational algorithms developed for genome-wide screening of small RNAs are based on ‘sequence or structural conservation’ among closely related species. The algorithms that seek sequence conservation such as sRNAPredict [29,30], and GMMI [31] search first for transcriptional signals such as promoters and terminators, and then examine nucleotide conservation. Since the sequence homology information is based only on the primary structure of RNA, the accuracy of this method may not be sufficiently adequate. Hence, some algorithms seek for phylogenetic conservation of secondary structure and/or thermal stability. This type of algorithm includes Pfold [32], MSARI [33], eQRNA [34], RNAz [35], etc. In this study, we employed a combination of three algorithms that search for different forms of conservation as a way to increase prediction accuracy: sRNAPredict [29,30], eQRNA [34], and RNAz [35] (Figure 1). The sRNAPredict algorithm uses the information of the location of transcriptional signals and primary sequence conservation of intergenic regions (IGRs). The eQRNA algorithm examines the conservation of secondary structures of RNA for prediction. It identifies base substitution patterns in pairwise alignments likely corresponding to a conserved RNA secondary structure rather than to a conserved coding frame or other genomic features. RNAz even measures thermodynamic stability, which is normalized with respect to both sequence length and base composition in addition to RNA consensus secondary structure. The eQRNA and RNAz algorithms are comparatively

strict methods for secondary structure conservation analysis compared to other methods such as Pfold [32] and MSARI [33]. To search for those conservations between closely-related streptococcal species, genome sequences and annotations of the following eight streptococci were used. *S. pyogenes* MGAS315, *S. equi* subsp. *zooepidemicus* MGCS10565, *S. mutans* UA159, *S. suis* 05ZYH33, *S. sanguinis* SK36, *S. gordonii* str. *Challis* substr. CH1, *S. pneumoniae* CGSP14, *S. agalactiae* NEM316.

Each algorithm of sRNAPredict, eQRNA, and RNAz respectively predicted 191, 312, and 187 intergenic genomic segments as putative sRNAs in *S. pyogenes* MGAS315. Among these predicted ones, the sequences immediately upstream of annotated open reading frames (ORFs) were removed from the candidates because they most likely correspond to putative riboswitches or other *cis*-regulatory elements. In addition, predicted candidates in prophages, all of which were located next to the integrase genes, were removed. Then, the intergenic genomic segments predicted by any two algorithms were considered as putative sRNA candidates. The final number of sRNA candidates left from these processes was 45 (Figure 1B, Table 3, and Table S6). Encouragingly, Pel, FasX, and RivX, which have been previously studied sRNAs, were included in these 45 streptococcal small RNA candidates (SSRCs). Among the 45 putative candidates, six (SSRC 8, 12, 15, 30, 32, 33) were predicted by all the three algorithms (Table 3).

### Verification of the transcription of the predicted sRNA candidates through reverse transcriptase PCR (RT-PCR) and Northern blotting

Before applying Northern blotting to verify the expression of streptococcal sRNA candidates, we screened the candidates with RT-PCR. RT-PCR can at least detect the presence or absence of their transcripts, even though it cannot distinguish whether the expressed transcripts are *cis*-elements attached to mRNAs or independently expressed sRNAs. In the RT-PCR analysis, we did not detect the expression of SSRC 1, 3, 6, 7, 22, 24, 28, 39, 40, so we eliminated them from the sRNA candidates.

Then, we examined the remaining candidates with Northern blotting. Since most *S. pyogenes* sRNAs previously described were highly expressed in the exponential phase of growth [20], RNA was extracted from cells at the exponential phase and used for Northern blotting. The predicted sRNA candidates could be expressed from either strand of DNA, so we designed and tested two probes for each candidate (Table S3).

Among the candidates, the following 14 SSRCs showed consistent signals on Northern blots: SSRC4 (FasX), SSRC8, SSRC10, SSRC12 (Pel/*sagA*), SSRC13, SSRC21, SSRC27, SSRC29, SSRC30, SSRC31, SSRC32, SSRC34, SSRC38, and SSRC41 (Figure 2). Some candidates (detected with 5' probes in the Table S3) were expressed from the top DNA strand of the MGAS315 chromosome sequence (GenBank: AE014074.1, <http://www.ncbi.nlm.nih.gov/nucore/21905618?report=fasta>) and the others (detected with 3' probes in the Table S3) were from the complementary DNA strand; The candidates, SSRC21, SSRC27, SSRC29, SSRC30, SSRC32, and SSRC34 were detected with their 5' Northern blot probes, and SSRC8, SSRC10, SSRC13, SSRC31, SSRC38, and SSRC41 were detected with their 3' probes. FasX and Pel/*sagA* were detected as expected. However, RivX was not detected probably because of its extremely low expression in the wild type [15]. Since FasX gave a constant signal, it was used as a control throughout the Northern blot analysis.

The size of each SSRC detected by Northern blot was calculated by measuring traveled distance of each band from a well of a polyacrylamide gel and compared to a standard curve

**Table 3.** The result of computational screening for sRNA candidates in *S. pyogenes*.

| SSRC <sup>a</sup> | Up ORF number | Up ORF name                                                       | up ORF <sup>b</sup> | Down ORF number | Down ORF name                                                 | down ORF <sup>b</sup> | Method <sup>#</sup> | Remark and reference |
|-------------------|---------------|-------------------------------------------------------------------|---------------------|-----------------|---------------------------------------------------------------|-----------------------|---------------------|----------------------|
| SSRC 1            | SPyM3_0029    | hypothetical protein                                              | >>>                 | SPyM3_0030      | adenylosuccinate lyase                                        | >>>                   | Q, Z                |                      |
| SSRC 2            | SPyM3_0054    | 30S ribosomal protein S8                                          | >>>                 | SPyM3_0055      | 50S ribosomal protein L6                                      | >>>                   | Q, Z                |                      |
| SSRC 3            | SPyM3_0156    | glucose-6-phosphate isomerase                                     | >>>                 | SPyM3_0157      | putative regulatory protein RofA related                      | <<<                   | Q, Z                | RivX [15]            |
| SSRC 4            | SPyM3_0174    | putative response regulator                                       | >>>                 | SPyM3_0175      | ribonuclease P                                                | >>>                   | Q, Z                | FasX [12]            |
| SSRC 5            | SPyM3_0199    | 30S ribosomal protein S7                                          | >>>                 | SPyM3_0200      | elongation factor G                                           | >>>                   | Q, Z                |                      |
| SSRC 6            | SPyM3_0201    | glyceraldehyde-3-phosphate dehydrogenase                          | >>>                 | SPyM3_0202      | putative amino acid ABC transporter ATP-binding protein       | <<<                   | Q, Z                |                      |
| SSRC 7            | SPyM3_0219    | putative oligopeptide ABC transporter                             | >>>                 | rRNA            | rRNA                                                          | >>>                   | Q, P                |                      |
| SSRC 8*           | SPyM3_0298    | putative cell envelope proteinase                                 | >>>                 | SPyM3_0299      | hypothetical protein                                          | >>>                   | Q, Z, P             |                      |
| SSRC 9            | SPyM3_0300    | methionyl-tRNA synthetase                                         | >>>                 | SPyM3_0301      | ribonucleotide-diphosphate reductase subunit beta             | >>>                   | Q, Z                |                      |
| SSRC10            | SPyM3_0439    | hypothetical protein                                              | >>>                 | SPyM3_0440      | putative calcium transporter                                  | >>>                   | Q, P                |                      |
| SSRC11            | SPyM3_0455    | putative cell-division protein                                    | >>>                 | SPyM3_0457      | putative metallo-beta-lactamase superfamily protein           | <<<                   | Q, Z                |                      |
| SSRC12*           | SPyM3_0480    | streptolysin S associated protein                                 | >>>                 | SPyM3_0481      | streptolysin S associated protein                             | >>>                   | Q, Z, P             | PeI [13,14]          |
| SSRC13            | SPyM3_0505    | putative DNA-entry nuclease                                       | >>>                 | SPyM3_0506      | phenylalanyl-tRNA synthetase subunit alpha                    | >>>                   | Q, Z                |                      |
| SSRC14            | SPyM3_0557    | putative ribosomal large subunit pseudouridine synthase           | >>>                 | SPyM3_0558      | bifunctional pyrimidine regulatory protein                    | >>>                   | Q, P                |                      |
| SSRC15*           | SPyM3_0582    | putative peptidoglycan hydrolase                                  | >>>                 | SPyM3_0583      | hypothetical protein                                          | <<<                   | Q, Z, P             |                      |
| SSRC16            | SPyM3_0588    | putative ABC transporter ATP-binding protein                      | >>>                 | SPyM3_0589      | hypothetical protein                                          | >>>                   | Q, Z                |                      |
| SSRC17            | SPyM3_0611    | purine nucleoside phosphorylase                                   | >>>                 | SPyM3_0612      | putative purine nucleoside phosphorylase                      | >>>                   | Q, Z                |                      |
| SSRC18            | SPyM3_0663    | branched-chain alpha-keto acid dehydrogenase subunit E2           | >>>                 | SPyM3_0664      | putative dihydrolopoamide dehydrogenase component E3          | >>>                   | Q, Z                |                      |
| SSRC19            | SPyM3_0664    | putative dihydrolopoamide dehydrogenase component E3              | >>>                 | SPyM3_0665      | extracellular hyaluronate lyase                               | <<<                   | Q, Z                |                      |
| SSRC20            | SPyM3_0762    | 2-amino-4-hydroxy-6-hydroxymethylhydropteridine pyrophosphokinase | >>>                 | SPyM3_0763      | UDP-N-acetylenolpyruvoylglucosamine reductase                 | >>>                   | Q, P                |                      |
| SSRC21            | SPyM3_0851    | putative anaerobic ribonucleotide reductase                       | <<<                 | SPyM3_0852      | putative cardiolipin synthetase                               | <<<                   | Q, P                | [20,42]              |
| SSRC22            | SPyM3_0918    | hypothetical protein                                              | <<<                 | SPyM3_0919      | hypothetical protein                                          | <<<                   | Q, Z                |                      |
| SSRC23            | SPyM3_0983    | putative maltose/maltodextrin-binding protein                     | >>>                 | SPyM3_0984      | putative maltose/maltodextrin ABC transport system (permease) | >>>                   | Q, Z                |                      |
| SSRC24            | SPyM3_0989    | hypothetical protein                                              | <<<                 | SPyM3_0990      | putative esterase                                             | <<<                   | Q, Z                |                      |
| SSRC25            | SPyM3_1093    | putative heavy metal/cadmium-transporting ATPase                  | <<<                 | SPyM3_1094      | hypothetical protein                                          | <<<                   | Q, Z                |                      |
| SSRC26            | SPyM3_1166    | isoleucyl-tRNA synthetase                                         | <<<                 | SPyM3_1167      | putative cell-division initiation protein                     | <<<                   | Q, Z                |                      |
| SSRC27            | SPyM3_1176    | UDP-N-acetylmuramoyl-L-alanyl-D-glutamate synthetase              | <<<                 | SPyM3_1177      | hypothetical protein                                          | <<<                   | Q, P                |                      |
| SSRC28            | SPyM3_1190    | asparagine synthetase AsnA                                        | <<<                 | SPyM3_1191      | carbamate kinase                                              | <<<                   | Q, Z                |                      |
| SSRC29            | SPyM3_1276    | hypothetical protein                                              | <<<                 | SPyM3_1277      | hypothetical protein                                          | <<<                   | Q, P                | [20,42]              |

Table 3. Cont.

| SSRC <sup>a</sup> | Up ORF number | Up ORF name                                | up ORF <sup>b</sup> | Down ORF number | Down ORF name                                                      | down ORF <sup>b</sup> | Method <sup>#</sup> | Remark and reference |
|-------------------|---------------|--------------------------------------------|---------------------|-----------------|--------------------------------------------------------------------|-----------------------|---------------------|----------------------|
| SSRC30*           | SPyM3_1280    | 3-dehydroquininate synthase                | >>>                 | SPyM3_1281      | putative acetate kinase                                            | <<<                   | Q, Z, P             |                      |
| SSRC31            | SPyM3_1356    | hypothetical protein                       | >>>                 | SPyM3_1357      | hypothetical protein                                               | >>>                   | Q, Z                |                      |
| SSRC32*           | SPyM3_1386    | putative N6-adenine-specific DNA methylase | <<<                 | SPyM3_1387      | hypothetical protein                                               | <<<                   | Q, Z, P             | [20,42]              |
| SSRC33*           | SPyM3_1391    | putative aminopeptidase C                  | <<<                 | SPyM3_1392      | NAD synthetase                                                     | <<<                   | Q, Z, P             |                      |
| SSRC34            | SPyM3_1510    | hypothetical protein                       | >>>                 | SPyM3_1511      | putative mannose-specific phosphotransferase system component IiAB | >>>                   | Q, Z                |                      |
| SSRC35            | SPyM3_1533    | heat-inducible transcription repressor     | <<<                 | SPyM3_1534      | N-acetylmuramoyl-L-alanine amidase                                 | <<<                   | Q, Z                |                      |
| SSRC36            | SPyM3_1644    | putative deoxyribonuclease hsdM subunit    | >>>                 | SPyM3_1645      | putative response regulator of salivaricin regulon                 | <<<                   | Q, Z                |                      |
| SSRC37            | SPyM3_1673    | hypothetical protein                       | <<<                 | SPyM3_1674      | putative serine acetyltransferase                                  | <<<                   | Q, Z                |                      |
| SSRC38            | SPyM3_1725    | laminin-binding protein                    | <<<                 | SPyM3_1726      | C5A peptidase precursor                                            | <<<                   | Q, Z                |                      |
| SSRC39            | SPyM3_1726    | C5A peptidase precursor                    | <<<                 | SPyM3_1727      | antiphagocytic M protein, type 3                                   | <<<                   | Q, Z                | [40]                 |
| SSRC40            | SPyM3_1766    | co-chaperonin GroES                        | <<<                 | SPyM3_1767      | putative endopeptidase C1p ATP-binding chain C                     | <<<                   | Q, P                |                      |
| SSRC41            | SPyM3_1798    | hypothetical protein                       | <<<                 | SPyM3_1799      | transcriptional regulator Spx                                      | <<<                   | Q, Z                |                      |
| SSRC42            | SPyM3_1817    | 50S ribosomal protein L33                  | >>>                 | SPyM3_1818      | putative cadmium resistance protein                                | >>>                   | Q, Z                | [40]                 |
| SSRC43            | SPyM3_1822    | hypothetical protein                       | >>>                 | SPyM3_1823      | hypothetical protein                                               | <<<                   | Q, Z                |                      |
| SSRC44            | SPyM3_1836    | hypothetical protein                       | <<<                 | SPyM3_1838      | tRNA uridine 5-carboxymethylaminomethyl modification enzyme GidA   | <<<                   | Q, Z                |                      |
| SSRC45            | SPyM3_1843    | hypothetical protein                       | <<<                 | SPyM3_1844      | putative ABC transporter membrane-spanning permease                | <<<                   | Q, Z                |                      |

<sup>a</sup>SSRC: *S. pyogenes* Small RNA Candidate. The nucleotide coordinates of SSRC predicted by each computational algorithm are listed in table S5.

<sup>b</sup>Genes present on the strand given in the *S. pyogenes* MGAS315 genome databases are indicated by >>> and those on the complementary strand by <<<.

<sup>#</sup>Algorithms that identify each sRNA candidate: Q, eQRNA; Z, RNAz; P, sRNAPredict.

\*sRNA candidates predicted by all the three algorithms, eQRNA, RNAz, and sRNAPredict.

doi:10.1371/journal.pone.0064021.t003

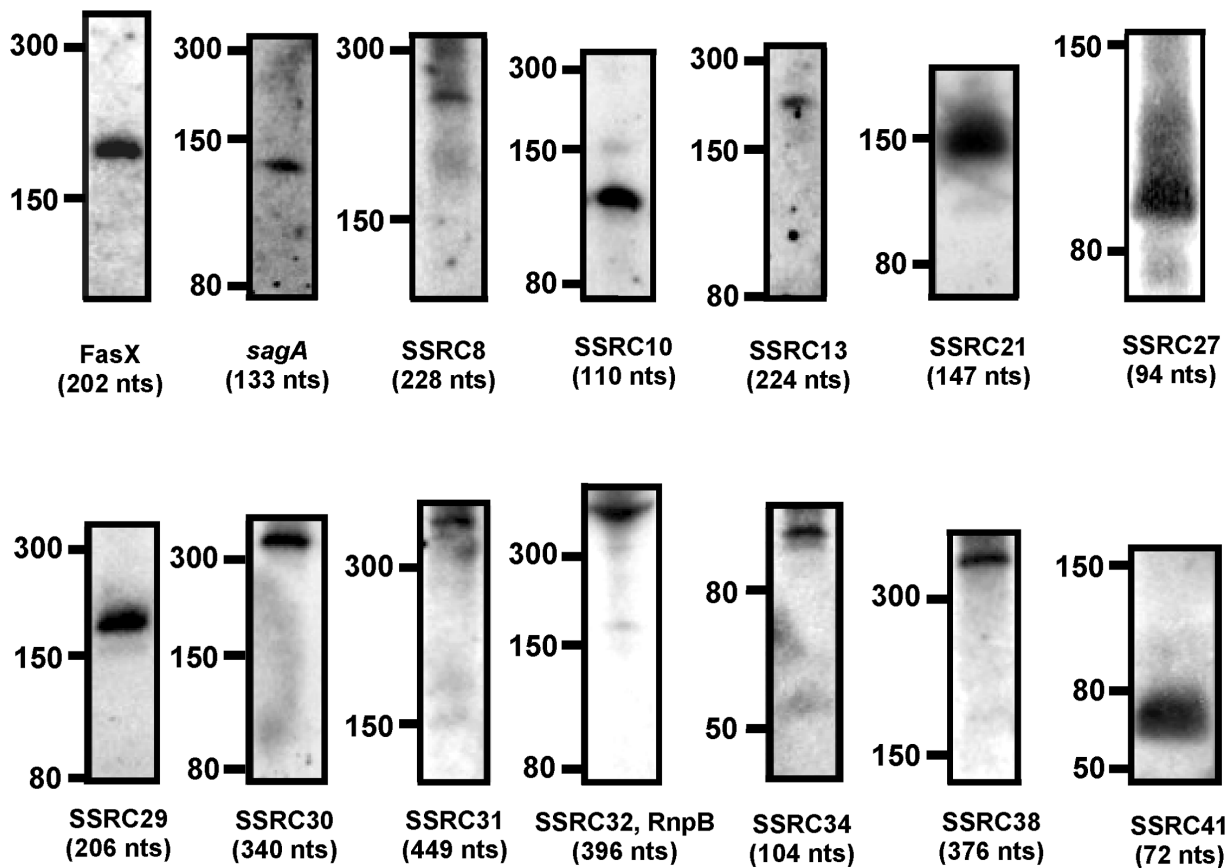

**Figure 2. Northern blot identified *S. pyogenes* sRNAs from the candidates predicted by the computational analysis.** Northern blots were performed with RNA (20  $\mu$ g) extracted from MGAS315 at the exponential growth phase (Optical density at 600 nm,  $OD_{600}$   $\sim$ 0.5). The names of the candidate RNA molecules are shown at the bottom of each Northern blot as SSRC (Streptococcal Small RNA Candidate) number. The locations of size markers in nucleotides are shown at the left side of each Northern blot. The approximate sizes of SSRCS calculated based on the location of the size markers are shown in nucleotides (nts) below their names.  
doi:10.1371/journal.pone.0064021.g002

obtained from the RNA ladder that was run with each sRNA side by side. The calculated approximate sizes of the SSRCS are shown in Figure 2. The calculated size of FasX (202 nts) was very close to the actual size (203 nts). The probe designed for Pel/*sagA*-transcript detected a 133 nts band only, which is the size close to the *sagA*-transcript, not Pel (459 nts).

#### Sequence analysis of the small RNAs detected by Northern blotting

Sequence analyses based on the predicted SSRC sequences (Table S6) and next-generation sequencing, RNA-Seq, revealed that SSRC13, SSRC31 and SSRC32 are probably not *trans*-acting regulatory sRNAs. SSRC13 and SSRC31 appear to be *cis*-elements in RNA-Seq analysis. The sequence of SSRC13 contains a T-box leader element, which is typically found upstream of aminoacyl-tRNA synthetase genes and some amino acid biosynthesis genes and involved in the regulation of those genes' expression by forming a transcription anti-terminator when uncharged tRNA binds the leader sequence [36]. SSRC13 is located upstream of phenylalanyl-tRNA synthetase subunit alpha. SSRC32 appears to be ribonuclease P (RNase P) RNA, RnpB. RNase P is a ribozyme, which is composed of two components, RnpA (protein) and RnpB (RNA), and cleaves the 5' leader sequence of precursor tRNAs to produce mature tRNAs [37].

We performed circular RACE (Rapid Amplification of cDNA Ends) to determine the 5' and 3' ends of selected small RNA candidates. Based on the calculated sizes, Northern blot probe-binding sites, and/or putative transcriptional signatures (promoters and Rho-independent terminators), we designed primers for each SSRC. From this analysis, we could determine the sequences of SSRC8, SSRC10, SSRC21, SSRC29, SSRC34 and SSRC41 (Figure 3). All the determined sequences contained a Rho-independent transcriptional termination signal (hairpin structure ending with or followed by thymidines). By examining the sequence of promoter regions, we could map putative  $-10$  and  $-35$  promoter sequences of SSRC10, SSRC21, SSRC29, and a putative CovR-binding sequence [38] upstream of SSRC34 (Figure 3).

The three computer algorithms used in this study compared sequences between closely related streptococcal species to search for putative sRNAs, so homologs of the newly discovered small RNA would exist in not only *S. pyogenes* but also other streptococcal pathogens. Thus, we searched for the homologs of the SSRCS in the other streptococci whose genome sequences are available publicly. Each streptococcal genome was blasted against the SSRC sequences determined through circular RACE. As expected, homologs of the SSRCS existed in many streptococcal bacteria, and more SSRC homologs were found in streptococci more closely related to *S. pyogenes* (Table 4) [39]. For example, *S. dysgalactiae*



**SSRC8 (340001-340282, 282 nts)**  
 GTCAAAAAAGAAGCTTTTGGCTTTGTCATTCAACATACTGAGCTTTAGTATTTTAGAAC  
 GGAGACACCCCCAGTTTTGCACTTAAAAAGCATAGACAGCTCTGCTGATGTGACATCCGG  
 TTTCTACGTGCGCTGTGAGCCAAAACAGCTGCTGTTTGTATGGAAAAAGTGGCGCCAAT  
 CGAGATTTTGGAGACCCTAGGCTCAAAAATAAGGCATAGAATTCCAAAGGAAGTCGCTGC  
 CGTGAGCACAACCTAAGAAAACTATTCCAAAAGACTTTTTCTGCAATTTGAAATACTGA  
 ATTTTCAGTATTTTCTTTTGTAACTAAGAGCA

**SSRC10 (482091-482203, 113 nts)**  
 CTGATTAGGGATTATTCCTGTGTTTATTAGTCAGGTTTTTACTATAATGGTTATTATATCAA  
 GGGAGTAGCAGACGGCTAGCCGTGATTGTATCGTCAATACGGAATTCGGTTTCCGGTAC  
 AATCTTAAACAGCGAGACTTGTGTTAAGAAAATAAACAGGCTTTTTTATTGAAACAAT

**SSRC21 (908040-907889, 152 nts)**  
 CGAACAAATGCCCTCTCTTGTAAATTTTCGTAAAATATGTTATAATATCTGTATGCGATG  
 AGTCGATTGTGACTGCAAAGTCACTTTTGGCGAGGGAGGTCATTAAGCGGGAAGCCGA  
 CTTTGATAATCTGTGTGAACCATTTTATCACAATCTTATTTATTAAGAATGCCCTTGGG  
 TTGAGATATCTCAATCTTTTTTAAATTTATTATCTTAGTTAA

**SSRC29 (1282349-1282148, 202 nts)**  
 TCATCTTCTCGTTGCTTAATGGCTATAAATTTGTTAGAATATTAGCAATCAGAGGTGCAT  
 TGAGTTGGTCTGTTACAGAGAGCGGTGGTGTGAGAAATCCGCACAGATGTCAAGGCTGG  
 TAGCTGAGGATCAGAAATCAGATATGAAAAGTAGCAGATCCATTTTATGGTCTGAAACAG  
 TGGTGGTACCGCGAAATCGTAACACGAAATTCGTCCTGTCCAGTGTAAAGCTGGATAGG  
 GATTATTTGGTTTCATTTGA

**SSRC34 (1503185-1503061, 125)**  
 TCAGAAATTTAGGATTAATAGGCAGATTATGATATTAAGGTGTTTTCAAGCTGTTTAA  
 AACAAAAATATGCTGAAAAATGTTGAAATTATTTAAATGATTTTCATTTTGGATAGCTG  
 TTGACAGAAGAAAACCACCATTTTCTGAAAAATAGTGGTTTCGTTTCTACTACAAGAA  
 AAGTTCTTCCAATTTTTTGGCAACACCGTCTTCTTCGTTGGAAAAAT

**SSRC41 (1828406-1828499, 94 nts)**  
 ACTTACACCTTCTTTCTAAAATTAAGTGCTATGCTTTATTATAGCTTATTTCTATTAAT  
 AAACAAGAATTTCAAGCGAAGAAGGTATTTAAAAAAGCTCTACAAGAGCTTTTAGAGTG  
 C

**Figure 3. Sequence analysis of candidate sRNA transcriptional start and stop sites, promoter regions and terminators.** The transcriptional start and stop sites of candidate sRNAs were determined by circular RACE. The sRNA sequences based on the transcriptional start and stop sites are in black. The putative  $-10$  and  $-35$  promoter sequences are colored green, and putative Rho-independent terminators, which are identified by the algorithm ARNold (<http://rna.igmors.u-psud.fr/toolbox/arnold/index.php>), are underlined. Neighboring sequences of the sRNA sequences are colored in blue. The deleted part in the SSRC21 deletion mutant,  $\Delta$ SSRC21cat, is italicized. A putative CovR-binding site upstream of SSRC34 is colored in red. The nucleotide coordinates based on the genome sequence of *S. pyogenes* MGAS315 and sizes of the sRNAs are shown in parenthesis.  
 doi:10.1371/journal.pone.0064021.g003

subsp. *equisimilis*, *S. equi*, *S. parauberis*, *S. salivarius*, *S. thermophilus* had more than 4 homologs. Notably, *S. dysgalactiae* subsp. *equisimilis*, which is a beta-hemolytic streptococcus very closely related to *S. pyogenes*, contained all the six SSRCS. Exceptionally, some closely related streptococci such as *S. canis* and *S. iniae* did not contain any homolog of the SSRCS. The most frequent SSRC found in streptococci among the six SSRCS was SSRC10.

#### The intracellular abundance of the putative *trans*-acting SSRCS varied between different growth phases

We determined the intracellular abundance of the putative *trans*-acting SSRCS at the exponential (EX), early stationary (ES), and late stationary (LS) growth phases of cells through Northern blotting (Figure 4). Agreeing with a previously reported result, FasX was most abundant at the exponential phase [20]. Most SSRCS exhibited variation of abundance between growth phases

and were expressed abundantly at the exponential and early stationary phase and least abundantly at the late stationary phase. The abundance of SSRC 8, 10, 21, 29, 30, and 38 was dramatically reduced at the late stationary phase, showing a similar pattern to that of the FasX transcript over the course of growth. On the other hand, SSRC 34 and 41 exhibited similar abundance throughout all growth phases.

#### mRNA transcripts showing differential abundance in the SSRC21 deletion mutant

To screen putative target mRNAs of an sRNA detected in this study, we employed differential RNA sequencing analysis. SSRC21 was chosen for this analysis because its expression was changed between growth phases, and initial computational prediction suggested that SSRC21 might influence the expression of several virulence factors. The transcript abundance profile in an

**Table 4.** The presence of homologs of SSRCs in other streptococci.

| <i>Streptococcus</i> spp.                                | SSRC8         | SSRC10       | SSRC21      | SSRC29       | SSRC34      | SSRC41     |
|----------------------------------------------------------|---------------|--------------|-------------|--------------|-------------|------------|
| <i>S. agalactiae</i> NEM316                              |               | 73% (1–109)  | 75% (1–100) | 74% (25–176) |             |            |
| <i>S. dysgalactiae</i> subsp. <i>equisimilis</i> GGS_124 | 77% (149–210) | 97% (1–113)  | 91% (1–152) | 98% (1–198)  | 74% (3–195) | 86% (1–94) |
| <i>S. equi</i> subsp. <i>equi</i> 4047                   |               | 96% (1–112)  | 79% (1–152) | 80% (1–180)  | 72% (3–125) | 79% (5–94) |
| <i>S. equi</i> subsp. <i>zooepidemicus</i> MGCS10565     |               | 94% (1–110)  | 79% (1–152) | 79% (3–180)  | 71% (1–90)  | 78% (1–90) |
| <i>S. gallolyticus</i> UCN34                             | 81% (154–247) | 81% (36–111) |             | 88% (25–81)  |             |            |
| <i>S. gordonii</i> str. <i>Challis</i> substr. CH1       |               | 70% (2–109)  | 69% (1–90)  |              |             |            |
| <i>S. infantarius</i> subsp. <i>infantarius</i>          | 83% (154–227) | 74% (2–111)  |             | 89% (25–81)  |             |            |
| <i>S. intermedius</i> JTH08                              | 76% (151–224) | 72% (2–111)  |             | 66% (2–149)  |             |            |
| <i>S. lutetiensis</i>                                    | 83% (154–227) |              |             |              |             |            |
| <i>S. macedonicus</i> ACA-DC 198                         | 78% (142–250) | 83% (36–111) |             | 86% (25–81)  |             |            |
| <i>S. mitis</i> B6                                       | 81% (152–229) | 80% (56–111) | 74% (2–100) |              |             |            |
| <i>S. mutans</i> UA159                                   | 78% (155–235) | 77% (1–109)  |             | 69% (3–176)  |             |            |
| <i>S. oralis</i> Uo5                                     | 76% (151–224) | 69% (2–111)  | 73% (1–100) |              |             |            |
| <i>S. parasanguinis</i> ATCC 15912                       | 79% (144–210) | 80% (2–89)   | 76% (1–50)  |              |             |            |
| <i>S. parauberis</i> KCTC 11537                          | 76% (152–210) | 89% (2–113)  | 86% (1–105) | 84% (1–60)   |             | 81% (2–53) |
| <i>S. pasteurianus</i> ATCC 43144                        | 85% (142–228) | 89% (2–113)  | 86% (1–105) | 84% (1–60)   |             | 81% (2–53) |
| <i>S. pneumoniae</i> CGSP14                              |               | 67% (2–106)  |             |              |             |            |
| <i>S. pseudopneumoniae</i> IS7493                        | 76% (151–242) | 68% (2–111)  | 74% (1–110) |              |             |            |
| <i>S. salivarius</i> JIM8777                             | 76% (154–242) | 77% (29–111) | 78% (1–50)  | 80% (3–87)   |             |            |
| <i>S. sanguinis</i> SK36                                 |               | 68% (2–109)  | 70% (2–100) |              |             |            |
| <i>S. suis</i> BM407                                     |               | 73% (1–111)  |             | 74% (3–179)  |             |            |
| <i>S. thermophilus</i> CNRZ1066                          | 83% (152–209) | 80% (29–111) | 78% (1–51)  | 80% (3–87)   |             |            |
| <i>S. uberis</i> 0140J                                   |               | 91% (1–113)  | 83% (1–103) | 69% (1–201)  |             | 74% (2–94) |

• This analysis was performed using the nucleotide BLAST tool in the NCBI website (<http://blast.ncbi.nlm.nih.gov/Blast.cgi>). Each genome was blasted against the SSRC sequences (Figure 3).

• The numbers (in %) in the cells indicate the identity between the homologous sequences identified by BLAST. The compared sequence in the BLAST result is indicated in parenthesis as nucleotide numbers in SSRC.

• The blank cells in the table indicate that no homologous sequence of more than 50 nucleotides was found.

• Other streptococci listed below did not show any homologous sequence to SSRCs: *S. anginosus* F0211, *S. australis* ATCC 700641, *S. caballi* DSM 19004, *S. canis* FSL Z3-227, *S. castoreus* DSM 17536, *S. constellatus* subsp. *pharyngis* SK1060, *S. criceti* HS-6, *S. cristatus* ATCC 51100, *S. devriesei* DSM 19639, *S. didelphis* DSM 15616, *S. downei* F0415, *S. entericus* DSM 14446, *S. ferus* DSM 20646, *S. henryi* DSM 19005, *S. hyovaginalis* DSM 12219, *S. ictaluri* 707-05, *S. infantis*, *S. iniae* 9117, *S. macacae* NCTC 11558, *S. marimammalium* DSM 18627, *S. massiliensis* 4401825, *S. merionis* DSM 19192, *S. minor* DSM 17118, *S. orisratti* DSM 15617, *S. ovis* DSM 16829, *S. peroris* ATCC 700780, *S. plurextorum* DSM 22810, *S. porci* DSM 23759, *S. porcinus* str. Jelinkova 176, *S. pseudoporcinus* SPIN 20026, *S. rattii* DSM 20564, *S. sobrinus*, *S. thoralensis* DSM 12221, *S. tigurinus* AZ\_3a, *S. urinalis* 2285-97, *S. vestibularis* F0396.

doi:10.1371/journal.pone.0064021.t004

SSRC21 deletion mutant was determined through Next-Generation Sequencing, RNA-Seq, and compared to that of the wild type MGAS315. To construct the SSRC21 deletion mutant,  $\Delta$ SSRC21cat, the SSRC21 gene in the chromosome was replaced with the chloramphenicol acetyl transferase gene, *cat*. In the RNA-Seq result, 142 transcripts exhibited differential abundance with the criteria of fold change in the mutant over the wild type, FC, greater than 2 or less than  $-2$ ,  $p < 0.01$ , and false discovery rate, FDR,  $< 5\%$  (Table S7). The transcripts (with known putative function) showing notable differential abundance between the mutant and the wild type were those of *ntp* genes encoding V-type ATPase subunits and their putative regulator (SpyM3\_0113 through SpyM3\_0122; fold changes in the mutant over wild type, FC, 4.2~7.4). Some transcripts encoding virulence factors also showed differential abundance: streptokinase A, FC 2.6; C5A peptidase, FC  $-2.1$ ; M protein, FC  $-2.4$ ; streptococcal phospholipase A2, FC  $-4.5$ ).

## Discussion

In this study, we discovered new putative *trans*-acting sRNA candidates in the human pathogen *S. pyogenes* using a combination of a bioinformatic prediction and verification with Northern blotting. To overcome the limitation of low accuracy of computational sRNA prediction, we employed three algorithms (sRNAPredict, eQRNA, and RNAz) that seek different kinds of conservations in sRNAs. Since only six were predicted as sRNA candidates by all the three algorithms, we also considered as sRNA candidates those that were predicted by any two algorithms. This resulted in 45 candidates, and the previously studied *S. pyogenes* sRNAs, Pel, FasX and RivX were included among them. Then, we examined their expression through reverse transcriptase PCR and Northern blotting and verified the expression of 14 candidates. In the end, this study added 7 new sRNAs, which are likely *trans*-acting, to the pool of streptococcal sRNAs, offering a significant source for future study of the role of sRNAs in *S. pyogenes* and related streptococcal pathogens.

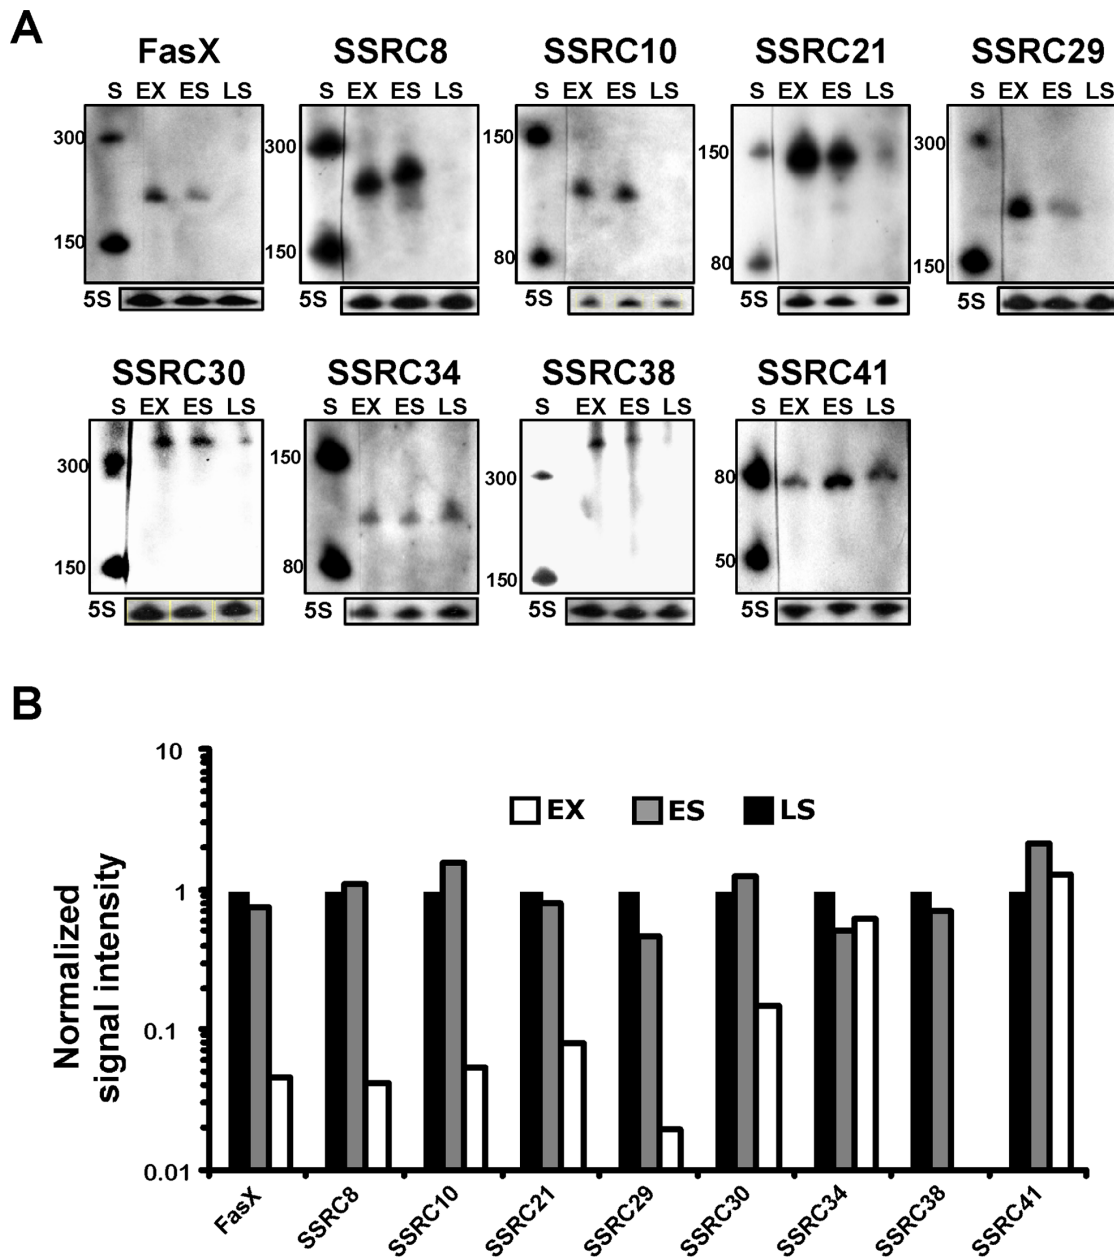

**Figure 4. The abundance of newly discovered streptococcal small RNA candidates (SSRCs) varied between growth phases.** A) The intracellular abundance of SSRCs at different growth phases. The abundance of each SSRC was determined over the course of growth (exponential phase, EX; early stationary phase, ES; late stationary phase, LS) through Northern blotting. Size markers (S) were run and their sizes are indicated at the left sides of Northern blots. The abundance of 5S RNA (5S) was also determined as a loading control and shown below each Northern blot. B) Abundance of each intracellular sRNA relative to that at the exponential growth phase. Abundance of sRNAs on Northern blots was determined by densitometry, normalized with the abundance of 5S RNA, and expressed relative to the abundance at the exponential growth phase. doi:10.1371/journal.pone.0064021.g004

Previously, there have been attempts to predict *S. pyogenes* sRNA employing bioinformatics. However, previous studies were not as complete as ours: none of them verified their predictions through Northern blot. Livny *et al.* developed sRNAPredict and predicted sRNA-encoding genes in 10 bacterial pathogens including *S. pyogenes* [29]. However, their prediction missed the previously well-studied *S. pyogenes* sRNAs, Pel, FasX and RivX, indicating low prediction accuracy. There were also other studies using a combination of algorithms to predict *S. pyogenes* small RNAs [40,41]. However, none of them verified the predicted candidate using Northern blot. Raasch *et al.* [41] used reverse-transcriptase

PCR to verify 4 putative candidates. However, RT-PCR cannot distinguish *cis*-acting RNAs such as riboswitches from independently expressed *trans*-acting small RNAs.

Previously, Perez *et al.* performed a genome wide search for *S. pyogenes* sRNA through a microarray-based analysis, and verified 14 new sRNAs with Northern blot [20]. Among the 14 sRNAs, only two (SR914400 and SR1251900) overlapped with our putative *trans*-acting sRNA candidates (SSRC21 and SSRC29). Thus, the two methods, microarray and computational prediction followed by Northern blot, appear to identify different sRNAs from each other. A possible explanation for this is that the microarray-based

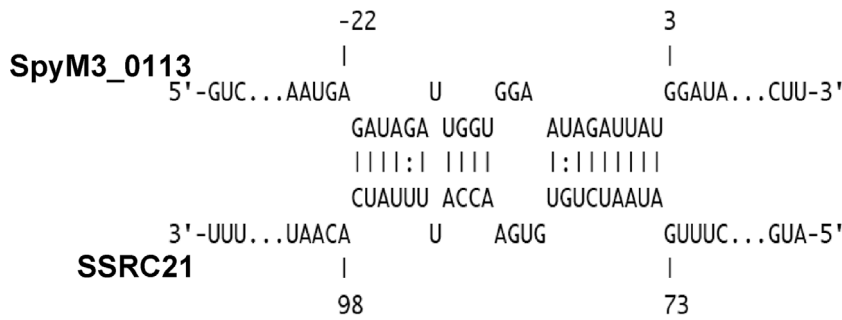

**Figure 5. Computational prediction of an interaction between the transcript of a putative regulator SpyM3\_0113 and SSRC21.** The drawing was generated with the algorithm IntaRNA [49]. doi:10.1371/journal.pone.0064021.g005

assay might not detect sRNAs with low expression. The expression of sRNAs is generally lower than that of the genes encoding house-keeping proteins, so the signals of sRNAs could be masked by higher signals of house-keeping gene transcripts. Another possibility is the expression difference of sRNAs between strains. The strain used in this study (MGAS315) was different from the strain used by Perez and coworkers (MGAS2221, M1 serotype). Perez and coworkers observed differences of sRNA expression between strains [20]. We also observed the expression difference of an sRNA between strains; the abundance of FasX in HSC5 (M14 serotype) was more than 10 times higher than that of MGAS315 (M3 serotype) at the growth condition used in this study (unpublished data). Recently, Patenge and coworkers published a paper that identified small non-coding RNAs in *S. pyogenes* M49 strain using intergenic tiling array [42]. In their study, only the same two sRNAs identified by Perez *et al.* (SSRC21, SSRC29) overlapped with our sRNAs.

Several sRNAs in *S. pyogenes* have been studied previously. The Pel (pleiotropic effect locus) RNA, which comprises *sagA*, the structural gene of the hemolysin streptolysin S (SLS) [14], has been reported to regulate the expression of Emm (M protein), Sic (streptococcal inhibitor of complement), Spn (*S. pyogenes* NAD(+) glycohydrolase) and SpeB (streptococcal cysteine protease) [13,14]. However, other studies could not recapitulate the previous studies [18,20,43], thus the influence of Pel on the expression of the virulence factors would be strain-specific. In our study, we only detected *sagA* mRNA, not Pel. This is probably because of the use of exponential phase cells in our study. Pel in MGAS315, the wild type strain we used for this study, is expressed at the stationary phase, not at the exponential phase [20]. Another sRNA FasX influences the expression of fibronectin-binding adhesin, fibrinogen-binding protein, and streptokinase, which converts plasminogen to blood clot-dissolving protease, plasmin. FasX appears to be the main effector molecule of the Fas (fibronectin/fibrinogen binding/hemolytic activity/streptokinase regulator) operon that consists of genes encoding two putative histidine kinases (FasB and FasC) and one response regulator (FasA, SPyM3\_0174) [12]. Ramirez-Pena and coworkers revealed the mechanism by which FasX controls the expression of streptokinase; FasX increases the stability of streptokinase mRNA by binding the 5' end of the mRNA [44]. RivX is an sRNA located downstream of the transcriptional regulator RivR. RivR and RivX activate the Mga regulon composed of genes involved in initial colonization and immune evasion and are repressed directly by CovR, the response regulator of the CovRS (or CsrRS) two-component system [15]. The 4.5S RNA, which is an RNA in the ribonucleoprotein complex of the signal recognition particle (SRP), was shown to influence the production of several secreted proteins and is

required for the virulence of *S. pyogenes* [16]. Mutation of 4.5S RNA leads the reduction of streptolysin O, NAD-glycohydrolase at the transcriptional level and the cysteine protease SpeB at the post-transcriptional level. Recently, Deltcheva *et al.* discovered that the maturation of crRNAs (CRISPR RNAs; clustered, regularly interspaced short palindromic repeats RNAs) in *S. pyogenes* is performed by a *trans*-encoded small RNA, tracrRNA, with the assistance of RNase III and the CRISPR-associated Dsn1 protein [19]. These examples above clearly show that small non-coding RNAs affect the physiology and pathogenesis of *S. pyogenes*.

*S. pyogenes* genes are differentially expressed during growth phases (reviewed in [45]). Generally, the factors necessary for colonization such as adhesins and immune evasion factors are expressed more at the exponential phase and the factors involved in persistence and spread are more expressed at the stationary phase. This growth phase-dependent differential expression may be triggered by nutritional status, quorum sensing, cell cycle status, metabolic by-products, pH or other factors involved in or derived from each growth phase. Many sRNAs are key components of regulatory cascades managing environmental change [46]. Intracellular abundance of most novel sRNAs varied between different growth phases (Figure 4), so some of the sRNAs may be involved in coordinating the expression of genes in response to environmental or other signals derived from growth phases.

The majority of *trans*-acting sRNA regulates translation by binding to mRNAs, so identification of target mRNAs of an sRNA would help define the role of the sRNA. Two approaches have been employed to predict target mRNAs of an sRNA: computational prediction approach using bioinformatics and experimental approaches such as genomics- or proteomics-based approaches. The bioinformatic approach is easily accessible since there are several algorithms available online such as TargetRNA [47] (<http://snowwhite.wellesley.edu/targetRNA/>), RNAPredator [48] ([http://rna.tbi.univie.ac.at/RNAPredator2/target\\_search.cgi](http://rna.tbi.univie.ac.at/RNAPredator2/target_search.cgi)) and IntaRNA [49] (<http://rna.informatik.uni-freiburg.de:8080/v1/IntaRNA.jsp>). Generally, these algorithms have been developed on the basis of the information of antisense-target RNA interactions previously identified experimentally. When we used these algorithms to find target mRNAs of the new sRNAs, there was not much overlap of target mRNA candidates between these algorithms. The general experimental approaches of high throughput screening for identification of target mRNAs are genomics- and proteomics-based approaches [50]. Between these experimental approaches, a genomics approach using microarray has been preferred. Generally, sRNAs affect translation, not transcription. However, influence of translation of mRNAs appears to influence mRNA degradation by RNases. Thus, microarray-based approaches that compare transcriptional profiles

between a pair of strains of an sRNA null mutant and the wild type strain or an over-expressing mutant have been used successfully to identify sRNA targets [51,52,53,54,55,56,57,58]. Degradation of some target RNAs may not be influenced by binding their cognate sRNAs in some cases. In this case, a proteomics-based approach based on 2-D gel electrophoresis would be useful to identify the targets of sRNAs. However, a proteomics-based approach has a downside of limited coverage of proteins. The expression levels of proteins produced by cells cover a wide range and many of them are not abundant. In many cases, sRNA regulates the expression of regulatory proteins, whose expression level is much lower than that of housekeeping proteins. Because of this limitation, the proteomics-based approach has not been used widely. Also, in *S. pyogenes*, many important proteins in physiology and pathogenesis are tightly associated with the cell wall, which makes the use of proteomics-based approaches more difficult.

To screen target mRNAs of a trans-acting sRNA, we used a genomics-based approach employing the next generation sequencing, RNA-Seq. We chose SSRC21 for this analysis because i) it has been identified by previous studies {Patenge, 2012 #115; Perez, 2009 #71}, ii) its sequence analysis after circular RACE provided predictable promoter and Rho-independent transcription terminator, iii) its differential expression might imply differential regulation of transcripts linked to growth phases, and iv) The possibility that SSRC21 controls the expression of several virulence factors was suggested by computational prediction. The differential RNA sequencing showed that SSRC21 influences transcript abundance of 142 genes (Table S7). Among those, all the 8 *ntp* genes encoding V-type ATPase subunits were notably more abundant in the SSRC21 mutant. It seems that the *ntp* genes are in an operon, so SSRC21 might interact with the *ntp* genes transcript or the transcript of a transcriptional regulator. A transcript encoding a putative regulator upstream of the *ntp* genes was also more abundant in the SSRC21. All of the computational algorithms mentioned above predicted an interaction between the transcript of the regulator and SSRC21 (Figure 5). The role of the V-type ATPase in the physiology and pathogenesis of *S. pyogenes* is not known. In eukaryotes, V-type ATPase is located in organelle membranes and pumps hydrogen ion (H<sup>+</sup>) from the cytosol to the organelles such as golgi and lysosome to acidify the inside of them [59]. Thus, the V-type ATPase in *S. pyogenes* might be involved in pumping hydrogen ion from the cytosol to overcome acid stress during growth or infection. *S. pyogenes* performs only lactic acid fermentation for production of energy and lowers the pH to ~5.4 in THY medium. In addition, *S. pyogenes* should survive the acidic condition inside the host's lysosome for successful infection. Another possible role of the V-type ATPase in *S. pyogenes* is to balance sodium ion concentration in the cytosol. *Enterococcus hirae* has a homologous V-type Na<sup>+</sup> ATPase complex that pumps Na<sup>+</sup> at high pH [60]. The V-type Na<sup>+</sup> ATPase confers *E. hirae* the ability to grow at pH 9.5. However, *S. pyogenes* cannot grow at pH 9.5. Several transcripts encoding virulence factors showed differential abundance in the SSRC21 mutant over the wild type. Among them, the two virulence genes encoding M protein and C5A peptidase are in an operon. Since their expression levels were similar, SSRC21 might control the translation of Mga, the

transcriptional regulator for M protein and C5A peptidase. However, computational prediction did not detect any significant interaction between SSRC21 and the *mga* transcript or the M protein transcript, so the influence of SSRC21 on the expression of M protein and C5A peptidase might be indirect.

In summary, we searched for small regulatory RNAs in the human pathogen *S. pyogenes* and identified 7 novel streptococcal sRNAs. Since their abundance varied between growth phases, these new sRNAs may coordinate the expression of genes in response to stress conditions linked to growth phases. Differential RNA sequencing analysis to screen putative target mRNAs of an sRNA implied that SSRC21 might be involved in the tolerance to acid stress during growth and/or infection or in the homeostasis of sodium ion inside cells. The list and expression pattern of the novel sRNAs discovered in this study provide a significant resource for future study of small RNAs and their role in *S. pyogenes*.

## Supporting Information

**Table S1 The number of *S. pyogenes* MGAS315 IGRs that have homologous sequences in the selected *Streptococcus* genome.**

(DOCX)

**Table S2 Calculation of sensitivity and specificity of RNaz and eQRNA independently and of the combination of the two analyses using known *S. pyogenes* RNAs.**

(DOCX)

**Table S3 Northern blot probe sequences.**

(DOCX)

**Table S4 RT-PCR and real time RT-PCR primer sequences.**

(DOCX)

**Table S5 Primers used in circular RACE.**

(DOCX)

**Table S6 The nucleotide coordinates of *S. pyogenes* Small RNA Candidates (SSRC) predicted by each computational algorithm.**

(DOCX)

**Table S7 Differential abundance of transcripts in the SSRC21 deletion mutant, compared to the wild type.**

(DOCX)

## Acknowledgments

We thank Dr. Doug F. Fix for sharing his lab space for Northern blotting, Song Ok Kang for technical assistance, and Megan Kemper for providing the protocol for circular RACE.

## Author Contributions

Conceived and designed the experiments: KHC QC. Performed the experiments: KHC RT JW NY. Analyzed the data: KHC JS JHK. Contributed reagents/materials/analysis tools: KHC JHK. Wrote the paper: KHC.

## References

- Gripenland J, Netterling S, Loh E, Tiensuu T, Toledo-Arana A, et al. (2010) RNAs: regulators of bacterial virulence. *Nat Rev Microbiol* 8: 857–866.
- Mraheil MA, Billion A, Kuenne C, Pischmarov J, Kreikemeyer B, et al. (2011) Comparative genome-wide analysis of small RNAs of major Gram-positive pathogens: from identification to application. *Microb Biotechnol* 3: 658–676.
- Storz G, Vogel J, Wassarman KM (2011) Regulation by small RNAs in bacteria: expanding frontiers. *Mol Cell* 43: 880–891.
- Wassarman KM, Zhang A, Storz G (1999) Small RNAs in *Escherichia coli*. *Trends Microbiol* 7: 37–45.
- Zhou Y, Xie J (2010) The roles of pathogen small RNAs. *J Cell Physiol* 226: 968–973.
- Toledo-Arana A, Repoila F, Cossart P (2007) Small noncoding RNAs controlling pathogenesis. *Curr Opin Microbiol* 10: 182–188.

7. Landt SG, Abeliuk E, McGrath PT, Lesley JA, McAdams HH, et al. (2008) Small non-coding RNAs in *Caulobacter crescentus*. *Mol Microbiol* 68: 600–614.
8. Gottesman S (2004) The small RNA regulators of *Escherichia coli*: roles and mechanisms. *Annu Rev Microbiol* 58: 303–328.
9. Majdalani N, Vanderpool CK, Gottesman S (2005) Bacterial small RNA regulators. *Crit Rev Biochem Mol Biol* 40: 93–113.
10. Carapetis JR, Steer AC, Mullholland EK, Weber M (2005) The global burden of group A streptococcal diseases. *Lancet Infect Dis* 5: 685–694.
11. Cunningham MW (2000) Pathogenesis of group A streptococcal infections. *Clin Microbiol Rev* 13: 470–511.
12. Kreikemeyer B, Boyle MD, Buttaro BA, Heinemann M, Podbielski A (2001) Group A streptococcal growth phase-associated virulence factor regulation by a novel operon (Fas) with homologs to two-component-type regulators requires a small RNA molecule. *Mol Microbiol* 39: 392–406.
13. Li Z, Sledjeski DD, Kreikemeyer B, Podbielski A, Boyle MD (1999) Identification of *pel*, a *Streptococcus pyogenes* locus that affects both surface and secreted proteins. *J Bacteriol* 181: 6019–6027.
14. Mangold M, Siller M, Roppenser B, Vlamincx BJ, Penfound TA, et al. (2004) Synthesis of group A streptococcal virulence factors is controlled by a regulatory RNA molecule. *Mol Microbiol* 53: 1515–1527.
15. Roberts SA, Scott JR (2007) RivR and the small RNA RivX: the missing links between the CovR regulatory cascade and the Mga regulon. *Mol Microbiol* 66: 1506–1522.
16. Trevino J, Perez N, Sumbly P (2010) The 4.5S RNA component of the signal recognition particle is required for group A Streptococcus virulence. *Microbiology* 156: 1342–1350.
17. Altuvia S (2007) Identification of bacterial small non-coding RNAs: experimental approaches. *Curr Opin Microbiol* 10: 257–261.
18. Betschel SD, Borgia SM, Barg NL, Low DE, De Azavedo JC (1998) Reduced virulence of group A streptococcal Tn916 mutants that do not produce streptolysin S. *Infect Immun* 66: 1671–1679.
19. Delcheva E, Chylinski K, Sharma CM, Gonzales K, Chao Y, et al. (2011) CRISPR RNA maturation by trans-encoded small RNA and host factor RNase III. *Nature* 471: 602–607.
20. Perez N, Trevino J, Liu Z, Ho SC, Babitzke P, et al. (2009) A genome-wide analysis of small regulatory RNAs in the human pathogen group A Streptococcus. *PLoS One* 4: e7668.
21. Beres SB, Sylva GL, Barbian KD, Lei B, Hoff JS, et al. (2002) Genome sequence of a serotype M3 strain of group A Streptococcus: phage-encoded toxins, the high-virulence phenotype, and clone emergence. *Proc Natl Acad Sci U S A* 99: 10078–10083.
22. Pall GS, Codony-Servat C, Byrne J, Ritchie L, Hamilton A (2007) Carbodiimide-mediated cross-linking of RNA to nylon membranes improves the detection of siRNA, miRNA and piRNA by northern blot. *Nucleic Acids Res* 35: e60.
23. Abdelrahman YM, Rose LA, Belland RJ (2010) Developmental expression of non-coding RNAs in *Chlamydia trachomatis* during normal and persistent growth. *Nucleic Acids Res* 39: 1843–1854.
24. Byeon WH, Weisblum B (1984) Post-transcriptional regulation of chloramphenicol acetyl transferase. *J Bacteriol* 158: 543–550.
25. Ji Y, McLandsborough L, Kondagunta A, Cleary PP (1996) C5a peptidase alters clearance and trafficking of group A streptococci by infected mice. *Infect Immun* 64: 503–510.
26. Granok AB, Parsonage D, Ross RP, Caparon MG (2000) The RofA binding site in *Streptococcus pyogenes* is utilized in multiple transcriptional pathways. *J Bacteriol* 182: 1529–1540.
27. Trapnell C, Roberts A, Goff L, Pertea G, Kim D, et al. (2012) Differential gene and transcript expression analysis of RNA-seq experiments with TopHat and Cufflinks. *Nat Protoc* 7: 562–578.
28. Backofen R, Hess WR (2010) Computational prediction of sRNAs and their targets in bacteria. *RNA Biol* 7: 33–42.
29. Livny J, Brencic A, Lory S, Waldor MK (2006) Identification of 17 *Pseudomonas aeruginosa* sRNAs and prediction of sRNA-encoding genes in 10 diverse pathogens using the bioinformatic tool sRNAPredict2. *Nucleic Acids Res* 34: 3484–3493.
30. Livny J, Fogel MA, Davis BM, Waldor MK (2005) sRNAPredict: an integrative computational approach to identify sRNAs in bacterial genomes. *Nucleic Acids Res* 33: 4096–4105.
31. Yachie N, Numata K, Saito R, Kanai A, Tomita M (2006) Prediction of non-coding and antisense RNA genes in *Escherichia coli* with Gapped Markov Model. *Gene* 372: 171–181.
32. Knudsen B, Hein J (2003) Pfold: RNA secondary structure prediction using stochastic context-free grammars. *Nucleic Acids Res* 31: 3423–3428.
33. Coventry A, Kleitman DJ, Berger B (2004) MSARI: multiple sequence alignments for statistical detection of RNA secondary structure. *Proc Natl Acad Sci U S A* 101: 12102–12107.
34. Rivas E, Eddy SR (2001) Noncoding RNA gene detection using comparative sequence analysis. *BMC Bioinformatics* 2: 8.
35. Washietl S, Hofacker IL, Stadler PF (2005) Fast and reliable prediction of noncoding RNAs. *Proc Natl Acad Sci U S A* 102: 2454–2459.
36. Grundy FJ, Henkin TM (1994) Conservation of a transcription antitermination mechanism in aminoacyl-tRNA synthetase and amino acid biosynthesis genes in gram-positive bacteria. *J Mol Biol* 235: 798–804.
37. Guerrier-Takada C, Gardiner K, Marsh T, Pace N, Altman S (1983) The RNA moiety of ribonuclease P is the catalytic subunit of the enzyme. *Cell* 35: 849–857.
38. Federle MJ, Scott JR (2002) Identification of binding sites for the group A streptococcal global regulator CovR. *Mol Microbiol* 43: 1161–1172.
39. Tapp J, Thollessen M, Herrmann B (2003) Phylogenetic relationships and genotyping of the genus *Streptococcus* by sequence determination of the RNase P RNA gene, *mpB*. *Int J Syst Evol Microbiol* 53: 1861–1871.
40. Livny J, Teonadi H, Livny M, Waldor MK (2008) High-throughput, kingdom-wide prediction and annotation of bacterial non-coding RNAs. *PLoS One* 3: e3197.
41. Raasch P, Schmitz U, Patenge N, Vera J, Kreikemeyer B, et al. (2010) Non-coding RNA detection methods combined to improve usability, reproducibility and precision. *BMC Bioinformatics* 11: 491.
42. Patenge N, Billion A, Raasch P, Normann J, Wisniewska-Kucper A, et al. (2012) Identification of novel growth phase- and media-dependent small non-coding RNAs in *Streptococcus pyogenes* M49 using intergenic tiling arrays. *BMC Genomics* 13: 550.
43. Biswas I, Germon P, McDade K, Scott JR (2001) Generation and surface localization of intact M protein in *Streptococcus pyogenes* are dependent on *sagA*. *Infect Immun* 69: 7029–7038.
44. Ramirez-Pena E, Trevino J, Liu Z, Perez N, Sumbly P (2010) The group A Streptococcus small regulatory RNA FasX enhances streptokinase activity by increasing the stability of the *ska* mRNA transcript. *Mol Microbiol* 78: 1332–1347.
45. Kreikemeyer B, McIver KS, Podbielski A (2003) Virulence factor regulation and regulatory networks in *Streptococcus pyogenes* and their impact on pathogen-host interactions. *Trends Microbiol* 11: 224–232.
46. Repoila F, Majdalani N, Gottesman S (2003) Small non-coding RNAs, co-ordinators of adaptation processes in *Escherichia coli*: the RpoS paradigm. *Mol Microbiol* 48: 855–861.
47. Tjaden B, Goodwin SS, Opdyke JA, Guillier M, Fu DX, et al. (2006) Target prediction for small, noncoding RNAs in bacteria. *Nucleic Acids Res* 34: 2791–2802.
48. Eggenhofer F, Tafer H, Stadler PF, Hofacker IL (2011) RNAPredator: fast accessibility-based prediction of sRNA targets. *Nucleic Acids Res* 39: W149–154.
49. Busch A, Richter AS, Backofen R (2008) IntaRNA: efficient prediction of bacterial sRNA targets incorporating target site accessibility and seed regions. *Bioinformatics* 24: 2849–2856.
50. Vogel J, Wagner EG (2007) Target identification of small noncoding RNAs in bacteria. *Curr Opin Microbiol* 10: 262–270.
51. Guillier M, Gottesman S (2006) Remodelling of the *Escherichia coli* outer membrane by two small regulatory RNAs. *Mol Microbiol* 59: 231–247.
52. Johansen J, Rasmussen AA, Overgaard M, Valentin-Hansen P (2006) Conserved small non-coding RNAs that belong to the sigmaE regulon: role in down-regulation of outer membrane proteins. *J Mol Biol* 364: 1–8.
53. Lease RA, Smith D, McDonough K, Belfort M (2004) The small noncoding DsrA RNA is an acid resistance regulator in *Escherichia coli*. *J Bacteriol* 186: 6179–6185.
54. Masse E, Gottesman S (2002) A small RNA regulates the expression of genes involved in iron metabolism in *Escherichia coli*. *Proc Natl Acad Sci U S A* 99: 4620–4625.
55. Masse E, Vanderpool CK, Gottesman S (2005) Effect of RyhB small RNA on global iron use in *Escherichia coli*. *J Bacteriol* 187: 6962–6971.
56. Papenfort K, Pfeiffer V, Mika F, Lucchini S, Hinton JC, et al. (2006) SigmaE-dependent small RNAs of *Salmonella* respond to membrane stress by accelerating global *omp* mRNA decay. *Mol Microbiol* 62: 1674–1688.
57. Sitka A, Pfeiffer V, Tedin K, Vogel J (2007) The RNA chaperone Hfq is essential for the virulence of *Salmonella typhimurium*. *Mol Microbiol* 63: 193–217.
58. Udekwu KI, Wagner EG (2007) Sigma E controls biogenesis of the antisense RNA MicA. *Nucleic Acids Res* 35: 1279–1288.
59. Nelson N, Perzov N, Cohen A, Hagai K, Padler V, et al. (2000) The cellular biology of proton-motive force generation by V-ATPases. *J Exp Biol* 203: 89–95.
60. Solioz M, Davies K (1994) Operon of vacuolar-type Na(+)-ATPase of *Enterococcus hirae*. *J Biol Chem* 269: 9453–9459.
61. Pichon C, Felden B (2003) Intergenic sequence inspector: searching and identifying bacterial RNAs. *Bioinformatics* 19: 1707–1709.
62. Lopez R, Silventoinen V, Robinson S, Kibria A, Gish W (2003) WU-Blast2 server at the European Bioinformatics Institute. *Nucleic Acids Res* 31: 3795–3798.
63. Thompson JD, Higgins DG, Gibson TJ (1994) CLUSTAL W: improving the sensitivity of progressive multiple sequence alignment through sequence weighting, position-specific gap penalties and weight matrix choice. *Nucleic Acids Res* 22: 4673–4680.
64. Macke TJ, Ecker DJ, Gutell RR, Gautheret D, Case DA, et al. (2001) RNAMotif, an RNA secondary structure definition and search algorithm. *Nucleic Acids Res* 29: 4724–4735.
65. Kingsford CL, Ayanbule K, Salzberg SL (2007) Rapid, accurate, computational discovery of Rho-independent transcription terminators illuminates their relationship to DNA uptake. *Genome Biol* 8: R22.
